# Supplementary material for: Factors related to overweight and obese populations maintaining metabolic health
Source: PeerJ. 2022 Apr 12;10:e13242. doi: 10.7717/peerj.13242 (PMC9012173; doi:10.7717/peerj.13242)
Supplement: Supplemental Information 1 [file peerj-10-13242-s001.xls]

## Sheet: MHO_raw_data
case_p_systolic	case_p_diastolic	case_p_systolic1	case_p_diastolic1	sex	age	BMI	waist_bl	HTNdrug	GLU	GLUdrug	CHO	TG	TGdrug	HDL	LDL	phy_act1	Edu_gp	Marital_gp	Smoke_gp	Alcohol_gp	hyperself	case_cr_lip	diabeteself	case_cr_comor	case_physical_date	BMI_fu	case_p_waist2	case_hyper_drug	Glu_lab09	case_diabetes_drug	TG_lab05	HDL_lab06	case_cr_lower	case_p_weight	case_p_height	phy_act2	Smoke_gp2	Alcohol_gp2
131	85	128	73	1	54.6	26.5	92.5	0	97	0	184	104	0	42	119	1	3	1	1	1					2017-11-21	27.12	92	7	101	4	59	47	3	73.2	164.3	0	1	1
117	81	122	72	1	53.9	29.2	102	0	95	0	132	60	0	42	78	2	2	1	1	1				7	2017-11-23	26.84	100		99	4	55	42	3	80.9	173.6	0	1	1
196	140	155	110	1	43	31.5	104	1	96	0	211	77	0	54	140	1	2	1	2	1				7	2017-11-28	34.67	110	7	137	4	87	45	3	102.7	172.1	0	1	1
111	81	112	76	1	49.2	26	87.5	0	92	0	186	80	0	41	126	0	3	1	2	1				7	2017-12-12	26.08	91	7	94	4	89	48	3	73	167.3	1	2	1
145	93	138	86	0	49.5	27.8	101	1	93	0	232	113	0	64	150	1	2	1	1	0				7	2017-11-28	33.93	115	1	110		106	66	3	81.4	154.9	0	1	0
145	104	123	81	0	52.4	28.7	85	1	88	0	207	82	0	52	134	0	2	2	1	0				7	2017-12-05	28.56	88			4			1	68.8	155.2	0	1	0
132	92	132	88	1	54.9	25.4	83.5	1	95	0	226	72	0	84	129	2	3	1	1	1				7	2017-11-30	22.94	83	7	102	4	71	100	3	65.9	169.5	2	3	1
135	85	120	72	0	47.6	24.9	91.5	0	93	0	171	115	0	66	83	1	2	1	1	0				7	2017-11-30	24.73	91	7	104	4	158	55	3	68.4	166.3	0	1	0
129	83	125	72	0	53.9	24.6	83.5	0	94	0	225	122	0	53	146	1	2	1	1	0				7	2017-12-05	24.85	83.5	7		4			1	60.1	155.5	0	1	0
140	85	121	70	0	54.7	27.5	94.5	0	98	0	193	147	0	46	122	1	3	2	1	0				7	2017-12-12	27.23	92	7	101	4	196	46	3	66.6	156.4	0	1	0
156	101	129	87	1	46.4	29.4	100	1	97	0	248	129	0	56	160	1	3	1	1	0				7	2017-12-07	28.31	102	7		4			3	90.7	179	1	1	0
128	95	113	81	0	46.2	25.8	83	0	96	0	204	56	0	49	136	0	2	2	2	0				7	2017-12-14	24.46	81	7	124	4	127	45	3	63.1	160.6	0	2	1
122	95	127	85	0	53.4	26.7	81	1	92	0	253	123	0	76	151	1	3	1	1	0				7	2017-12-19	27.76	85	7	96	4	154	67	3	71.6	160.6	0	1	0
111	77	108	70	0	48.7	24	88	0	96	0	237	66	0	85	135	1	3	1	1	0				7	2017-12-21	23.83	87	7		4			1	62.3	161.7	2	1	0
119	87	107	72	0	36.6	27.6	86	0	85	0	155	46	0	44	98	1	3	2	1	0				7	2017-12-21	32.16	89	7		4			3	88.5	165.9	1	1	0
129	85	101	64	1	50.1	25.2	85.5	0	97	0	217	126	0	58	136	1	2	1		1				7	2017-12-21	25.02	88	7		4			3	70.2	167.5	2	1	1
140	92	111	84	1	52.1	26.7	93	0	93	0	210	96	0	40	145	1	3	1	3	0				7	2017-12-14	26.55	91	7	107	4	117	46	3	76.1	169.3	1	1	1
131	90	125	88	0	45.3	24.2	87	1	85	0	186	94	0	60	112	0	2	1	2	0				7	2017-12-21	25.51	88	7		4			3	67.7	162.9	0	2	1
119	83	116	77	1	42.1	24.7	79	0	96	0	206	113	0	65	129	1	3	1	1	0				7	2018-02-27	24.78	90	7		4			3	70.2	168.3	0	1	0
118	83	122	86	1	38.5	25.8	92	1	91	0	154	91	0	41	93	0	2	1	1	0				7	2018-03-06	29.45	97	7	97	4	117	37	3	79.6	164.4	0	1	0
108	73	96	69	0	46.1	25.2	88.5	0	93	0	232	87	0	62	146	1	3	1	1	0				7	2018-02-27	23.74	92	7		4			3	58.3	156.7	0	1	0
139	87	126	77	1	48.8	28.6	99	0	93	0	174	238	1	41	99	1	3	1	2	0				7	2018-04-10	28.02	93	7	102	4	93	55	3	83.1	172.2	0	3	0
135	82	123	75	1	50.6	28.2	97	0	134	1	166	62	0	50	107	1	3	1	1	0				7	2018-03-09	30.99	100	5	131	1	93	46	1	88.5	169	0	1	0
121	82	117	72	1	40.7	24.7	88	0	89	0	160	147	0	40	97	0	3	1	1	0				7	2018-02-27	24.87	83	7		4			3	74.1	172.6	0	1	0
129	90	129	84	1	51.9	25.7	82	0	96	0	260	154	1	55	184	1	3	1	1	0				7	2018-03-09	27.29	83	7	120	4	82	58	1	73.3	163.9	0	1	0
115	68	108	66	0	43.8	24.4	77.5	0	110	1	144	65	0	65	68	1	3	1	1	0				7	2018-03-09	24.88	80	7	150	4	101	74	3	59.7	154.9	1	1	0
102	76	120	84	1	46	32.1	110	0	102	1	169	54	0	54	97	1	3	1	3	0				7	2017-12-21	26.27	88.5	7		4			3	90.5	185.6	2	3	0
165	116	138	89	1	39.1	28.5	101	1	87	0	232	95	0	51	154	2	3	1	1	0				7	2018-03-09	32.62	108	7	98	4	154	46	3	111.4	184.8	1	1	0
108	64	100	65	0	38.7	24	82	0	76	0	182	62	0	57	110	0	3	1	1	0				7	2018-03-13	22.22	76	7	79	4	67	64	3	55.2	157.6	2	1	0
166	106	114	81	1	37.9	29.4	99	0	89	0	363	328	1	52	245	1	2	1	1	0				7	2018-03-13	30.33	101	7	93	4	285	44	3	85.6	168	1	1	0
132	88	114	78	0	46.3	27.4	87	0	105	1	231	111	0	55	153	2	2	1	1	0				7	2018-03-13	32.3	105	7	116	4	185	47	3	75.8	153.2	0	1	0
114	74	108	64	1	36.2	26.7	88	0	100	1	209	78	0	61	133	0	3	1	2	1		2		7	2018-03-20	28.09	95	7	106	4	71	53	3	83.6	172.5	1	2	1
130	84	116	77	1	49.5	25.7	91	0	93	0	223	145	0	50	144	0	2	1	1	1		2		7	2019-03-12	26.14	85.7		97		207	42		75.2	169.6	0	1	0
146	100	126	83	1	50.5	25.5	86	0	97	0	181	119	0	50	117	1	2	1	1	0	2	2	2	7	2018-03-23	26.49	85	7	105	4	110	53	3	69	161.4	0	1	0
156	95	122	76	1	51.6	25.4	91	0	114	1	210	79	0	56	145	0	2	1	2	0	2	2	2	7	2018-03-27	25.95	87	7	132	1	55	56	3	76.4	171.6	2	2	0
122	80	109	75	1	51.9	25	87	0	99	0	191	60	0	48	138	2	2	1	2	1	2	3	3	7	2018-03-23	27.3	89	7	102	4	63	44	3	76.5	167.4	2	1	0
118	80	107	71	0	38.8	25.2	88.5	0	88	0	218	200	1	66	133	2	3	1	1	0	2	2	2	7	2018-03-30	24.2	80	7	96	4	44	62	3	67.5	167	0	1	0
127	82	124	75	1	49.1	26.9	94	0	111	1	171	133	0	45	113	2	3	1	1	0	2	2	2	7	2018-04-10	27.66	92	7	116	4	104	44	3	80.8	170.9	0	1	0
119	75	120	81	0	45.8	25.4	78	0	94	0	192	63	0	49	137	1	2	1	1	1	2	2	3	7	2018-04-10	25.05	79	7	95	4	73	42	3	59.1	153.6	1	1	0
160	97	151	95	0	54.8	24.4	86	1	94	0	267	84	0	64	194	2	1	1	1	0	2	3	2	7	2018-04-13	22.97	85	5	91	4	105	68	1	50.8	148.7	1	1	0
93	59	111	74	1	54.3	26.8	96	0	88	0	234	195	1	42	165	0	2	1	2	1	2	2	2	7	2018-04-13	25.32	91	7	92	4	99	45	3	72.4	169.1	0	2	0
117	81	132	91	1	42.7	24.5	87	1	97	0	191	100	0	56	123	0	3	1	1	0	2	2	2	7	2018-04-13	23.78	86	5	96	4	71	54	3	72.9	175.1	0	1	0
113	85	124	88	0	48.8	27.9	96	1	80	0	244	143	0	50	172	1	3	1	1	0	2	2	2	7	2018-05-04	26.8	90	7	91	4	182	50	3	71.3	163.1	1	1	0
132	87	140	87	1	40.2	28	83.4	1	94	0	180	121	0	41	126	1	3	1	1	0	2	2	2	7	2018-04-20	28.87	82	5	96	4	106	35	3	76.8	163.1	1	1	0
120	83	118	74	1	41	24.1	83	0	83	0	202	67	0	66	130	1	2	1	1	0	3	3	2	7	2018-04-17	24.38	80	7	98	4	83	62	3	72.3	172.2	1	1	1
158	104	126	80	1	46.3	27.7	95	0	87	0	163	146	0	37	110	0	3	1	1	0	2	2	2	7	2018-04-20	28.83	96	7	99	4	161	41	3	89.2	175.9	0	1	1
160	99	135	85	1	50.4	26.2	92	1	88	0	253	71	0	63	176	1	2	1	1	0	2	2	2	7	2018-04-17	26.05	86	7	84	4	81	60	3	73.6	168.1	2	1	0
166	101	149	99	1	52.5	24	86.5	1	98	0	201	98	0	84	108	0	3	1	1	0	2	2	2		2018-04-27	22.95	74	7	99	4	69	77	3	59.2	160.6	2	1	0
132	84	126	82	1	41.4	27.5	96	0	94	0	164	84	0	42	109	0	3	1	2	1	2	2	2	7	2018-05-02	29.2	93	7	109	4	132	34	3	88.4	174	0	2	1
106	61	116	66	0	48.9	24.9	90	0	85	0	215	116	0	65	135	1	3	1	1	0	2	2	2	7	2018-04-24	23.14	77	7	83	4	129	55	3	55.6	155	2	1	0
104	70	103	64	1	54.2	24.7	83	0	96	0	155	48	0	55	89	2	3	1	2	0	2	2	2	7	2018-04-27	25.55	83	7	96	4	44	49	3	68.3	163.5	2	3	0
139	95	125	83	1	54.4	26.6	86	0	84	0	189	67	0	53	128	0	2	1	1	0	2	2	2	7	2018-05-09	25.68	84	7	110	4	85	46	3	71.1	166.4	0	1	0
138	87	137	89	1	50.6	24.7	90	1	95	0	187	86	0	52	126	0	2	1	3	1	2	2	2	7	2018-12-15	24.72	84.5	6	101		114	44		68.6	166.6	0	3	1
150	85	125	86	0	53.3	36.6	108	1	99	0	223	109	0	54	158	1	1	1	1	0	2	3	2	7	2018-05-02	39.27	119	7	100	4	121	46	3	97.9	157.9	0	1	0
112	77	102	68	0	53.1	24.3	81	0	96	0	184	61	0	72	111	0	2	1	1	0	2	2	2	7	2018-05-09	26.19	90	7	109	4	89	45	3	64.8	157.3	0	1	0
122	76	107	74	0	51.1	25.6	91	0	93	0	175	63	0	69	96	0	2	1	1	0	3	2	3	7	2018-05-15	26.38	95	7	104	4	46	64	3	66.2	158.4	1	1	1
118	85	110	84	1	35.3	31.3	107	0	90	0	188	158	1	42	131	0	3	1	1	0	2	3	2	7	2018-05-24	31.17	105	7	103	4	217	36	3	95.8	175.3	1	1	1
115	71	98	61	0	49.3	24.1	79	0	83	0	226	107	0	76	141	0	2	1	1	0	2	2	2	7	2018-05-15	25.73	86	7	98	4	115	57	3	63.5	157.1	1	1	0
113	78	103	72	0	49.4	24.8	81	0	97	0	237	81	0	77	162	1	3	1	3	0	2	2	2	7	2018-05-18	23.75	83	7	105	4	84	75	1	62.8	162.6	1	1	0
133	86	105	80	0	49.1	25.6	103	0	93	0	187	92	0	60	129	0	3	2	1	0	2	2	2	7	2018-05-22	26.16	100	7	111	4	168	58	3	67.3	160.4	1	1	0
198	117	110	68	0	46.1	24.2	79	0	99	0	178	182	1	57	100	0	3	1	1	0	2	2	2	7	2018-12-15	23.83	70.5		102		99	71		57.7	155.6	1	1	1
114	74	119	75	0	47.8	24.1	86	0	99	0	216	91	0	51	164	2	3	1	1	0	2	2	2	7	2018-05-24	21.99	83	5	96	4	152	45	3	58	162.4	0	1	0
119	79	114	75	1	41.5	24.2	90.5	0	96	0	186	138	0	39	125	1	3	1	3	0	2	2	2	7	2018-05-22	24.75	95	7	97	4	95	44	3	72.2	170.8	0	1	0
120	70	126	81	1	35.6	26.3	90.5	0	87	0	191	78	0	52	134	0	3	1	3	0	2	3	2	7	2018-12-15	23.61	75		87		71	48		73.8	176.8	1	3	0
132	89	106	75	0	40.3	29.5	90	0	83	0	172	118	0	59	98	0	2	1	1	0	2	3	2	7	2018-10-31	32.28	89.5		102	4	158	54	3	84.1	161.4	0	1	0
121	83	103	71	0	39.6	25.4	88	0	91	0	169	67	0	56	102	0	2	1	1	0	2	3	3	7	2018-10-25	27.16	79	7	80	4	81	50	3	65	154.7	0	1	0
128	75	118	75	1	53.7	24.6	83	0	85	0	217	88	0	56	150	1	2	1	1	0	2	2	2	7	2018-10-23	23.41	76	7	83		93	59	3	64.5	166	1	1	0
124	71	116	78	1	53.9	25	85	0	84	0	194	216	1	40	119	1	1	1	1	1	2	2	2	7	2018-10-23	24.79	86.7	7	97		139	46	3	70.9	169.1	0	1	1
135	80	116	81	0	49	30.1	107	0	90	0	272	326	1	59	181	0	2	1	1	0	3	3	3	7	2018-11-06	29.32	88		119		165	62	1	70.9	155.5	0	1	0
107	77	113	77	0	43.3	27.6	88	0	81	0	174	57	0	62	105	2	3	1	1	0	2	2	2	7	2018-10-31	27.91	84.4		89	4	61	66	3	73.6	162.4	2	1	1
125	89	115	81	0	53.2	31.1	90	0	93	0	223	85	0	55	162	2	2	1	1	0	2	2	2	7	2018-10-24	31.65	91		96		81	50	3	78.7	157.7	0	1	0
154	103	119	86	1	39.3	33.6	103.5	1	94	0	258	124	0	48	202	1	3	1	2	0	2	2	2	7	2018-10-31	40.03	112		102		125	46	1	118	171.7	0	3	1
121	82	103	66	0	47.8	24.5	80	0	81	0	195	102	0	60	134	1	2	1	3	0	2	3	2	7	2018-12-08	24.52	72.5		91		106	62		59.3	155.5	1	1	0
103	69	109	73	0	54.1	24.3	83	0	96	0	279	322	1	51	189	0	3	1	1	0	2	3	2	7	2018-11-08	22.85	68		93		152	52	3	57.4	158.5	0	1	0
130	78	132	87	0	50.2	27.9	88	1	83	0	181	91	0	62	113	2	1	1	1	0	2	2	2	7	2018-12-08	29.34	86.5	6	89		68	64	1	69.4	153.8	0	1	0
140	96	128	93	0	39.3	29.3	94.5	1	82	0	189	79	0	64	116	1	3	1	1	0	2	2	2	7	2018-11-08	29.03	89.8		67		104	66	3	80	166	0	1	0
109	75	109	76	0	47	31	93	0	92	0	246	56	0	72	170	1	3	1	1	0	2	3	2	7	2018-12-08	32.54	96		86		62	63		80.1	156.9	0	1	0
121	71	99	68	0	51.6	24.1	83	0	85	0	188	111	0	66	113	2	2	1	1	0	2	3	2	7	2018-11-08	23.91	74		83		93	50		60.9	159.6	1	1	0
134	89	135	90	1	46.6	24.2	83	1	96	0	160	112	0	56	88	2	2	2	1	1	2	2	2	7	2018-12-15	24.7	80.2	4	92		102	69		68.4	166.4	0	1	1
159	110	122	96	0	47.4	27	83.5	1	79	0	152	41	0	57	89	1	2	1	1	0	2	3	2	7	2018-12-08	26.18	74.5		80		71	59		73.8	167.9	0	1	0
127	90	116	82	1	50	25.4	87.5	0	88	0	186	72	0	62	117	0	3	1	1	0	2	2	2	7	2018-12-08	24.98	83.4	7	83		66	57	3	75.1	173.4	0	1	0
139	95	122	85	1	44.5	26.9	92	1	82	0	156	43	0	48	102	2	3	1	1	0	2	3	2		2018-12-08	25.26	82.4	7	81		42	72	3	68.1	164.2	1	1	1
120	80	112	71	0	49.9	30.5	107	0	84	0	208	86	0	66	132	0	2	1	1	0	2	2	2	7	2018-11-15	29.94	90.2		88		70	76		75.7	159	0	1	0
126	86	119	77	0	46.2	24.7	87.5	0	81	0	179	42	0	71	107	2	2	2	1	0	2	2	2	7	2018-11-15	26.59	78.1		87		84	66	3	61.1	151.6	0	1	0
123	85	127	88	0	48.5	27.7	94.5	1	81	0	248	110	0	67	171	1	2	1	1	0	3	2	2	7	2018-12-19	25.73	79	5	76		111	67		65.3	159.3	0	1	0
143	83	132	86	1	48.4	26.9	95	1	95	0	168	49	0	46	120	0	3	1	2	0	2	2	2	7	2018-11-13	27.11	92.5		101		70	42	3	80.2	172	1	2	0
154	96	141	96	1	51.1	29	95	1	90	0	177	57	0	55	120	2	3	1	1	0	2	2	2	7	2018-12-12	30.09	92.4		87		74	40	3	78	161	0	1	0
136	84	121	84	1	48.3	26.5	91	0	86	0	211	126	0	67	137	1	2	1	1	1	2	2	3	7	2018-11-20	28.11	83.6		99		124	57		82	170.8	0	1	1
105	66	104	76	0	48	24.1	78	0	92	0	171	106	0	49	111	0	2	1	1	0	2	2	2	7	2018-11-28	24.49	73		99		96	48		62.3	159.5	0	1	0
